# Supplementary material
Source: ML conference proceedings conference paper supplement (https://proceedings.mlr.press/v48/zahavy16.html)
Supplement: Supplementary file 1 [file zahavy16-supp.pdf]

**Graying the black box: Understanding DQNs - Supplementary material.**

000  
001  
002  
003  
004  
005  
006  
007  
008  
009  
010  
011  
012  
013  
014  
015  
016  
017  
018  
019  
020  
021  
022  
023  
024  
025  
026  
027  
028  
029  
030  
031  
032  
033  
034  
035  
036  
037  
038  
039  
040  
041  
042  
043  
044  
045  
046  
047  
048  
049  
050  
051  
052  
053  
054

055  
056  
057  
058  
059  
060  
061  
062  
063  
064  
065  
066  
067  
068  
069  
070  
071  
072  
073  
074  
075  
076  
077  
078  
079  
080  
081  
082  
083  
084  
085  
086  
087  
088  
089  
090  
091  
092  
093  
094  
095  
096  
097  
098  
099  
100  
101  
102  
103  
104  
105  
106  
107  
108  
109

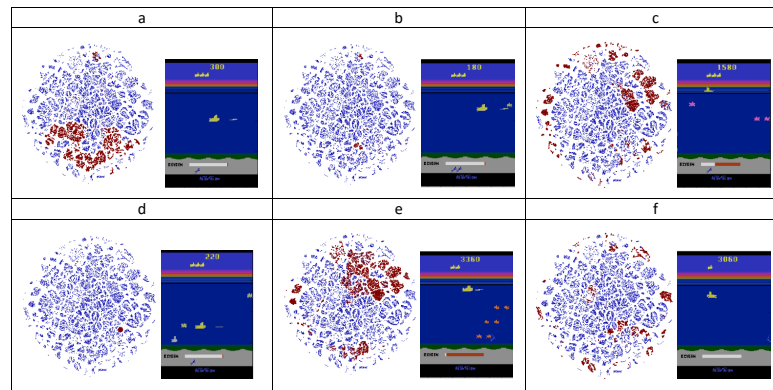

Figure 1. Seaquest states partitioned on the t-SNE map by different measure. a: Number of taken divers = 1. b: Number of taken divers = 2. c: Agent is next to sea level (filter by vertical position < 60). d: Agent is never visiting the lower 1/3 part of the frame. We mark the state of maximal diving depth (filter by vertical position > 128). e: Oxygen level < 0.05. f: Oxygen level > 0.98.

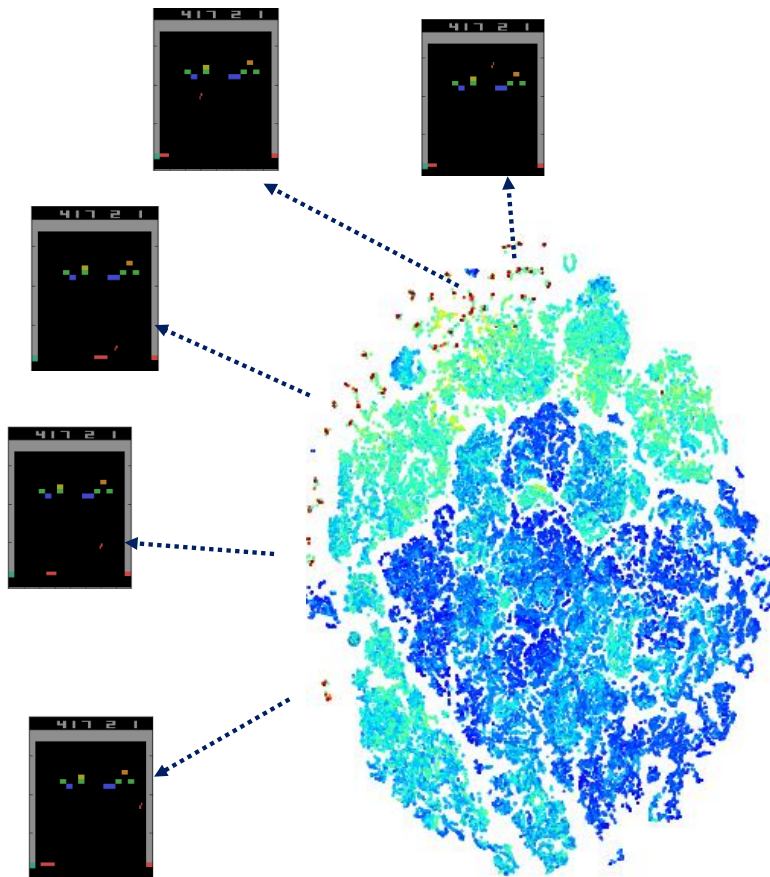

Figure 2. t-SNE for Breakout colored by time. Examples of repeated states by the agent are presented.

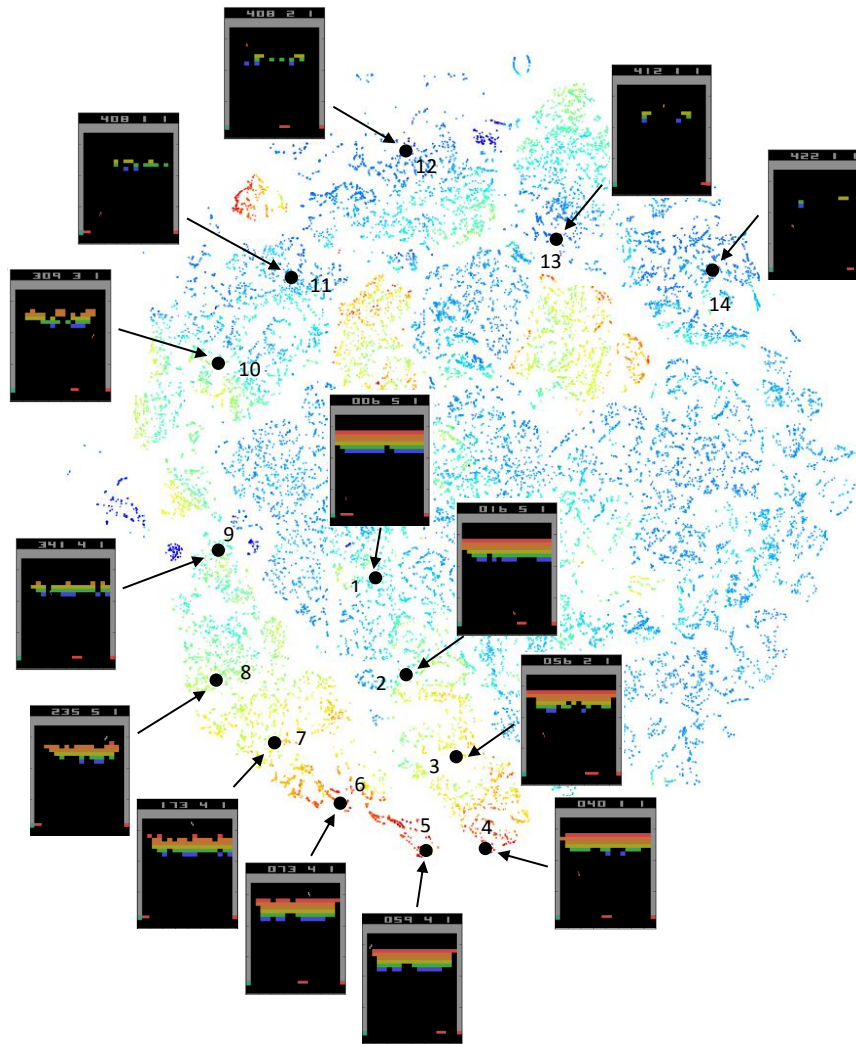

Figure 3. t-SNE for Breakout colored by time. Examples of states along the option path are presented.

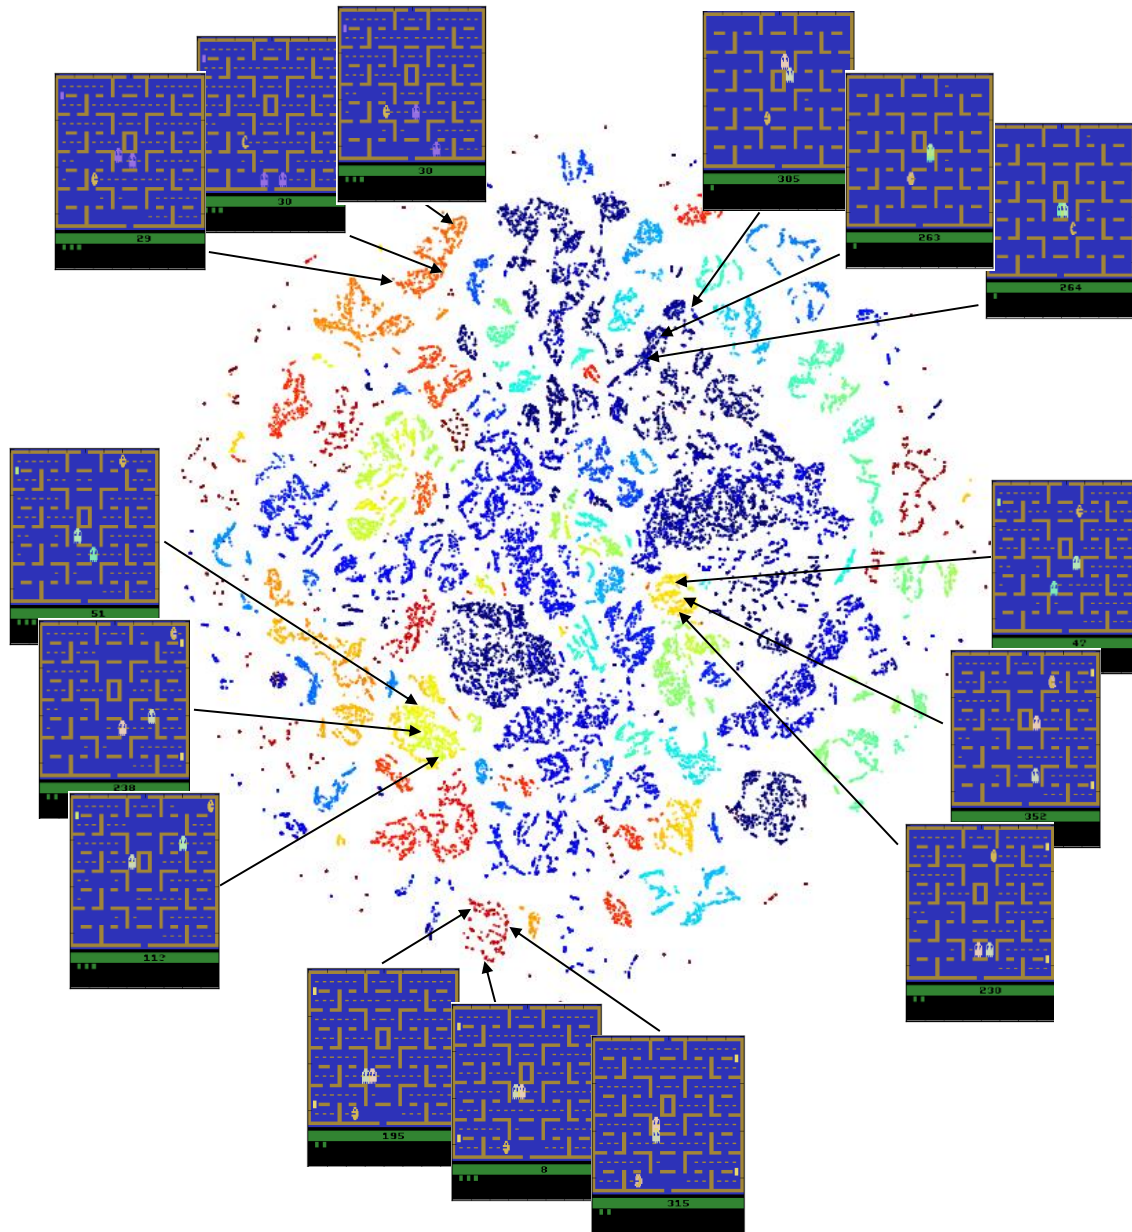

Figure 4. Pacman t-SNE with example states.
